# Supplementary material
Source: PubMed Central journal article supplement (PMC8026481)
Supplement: NIHMS1629844-supplement-1.pdf [file NIHMS1629844-supplement-1.pdf]

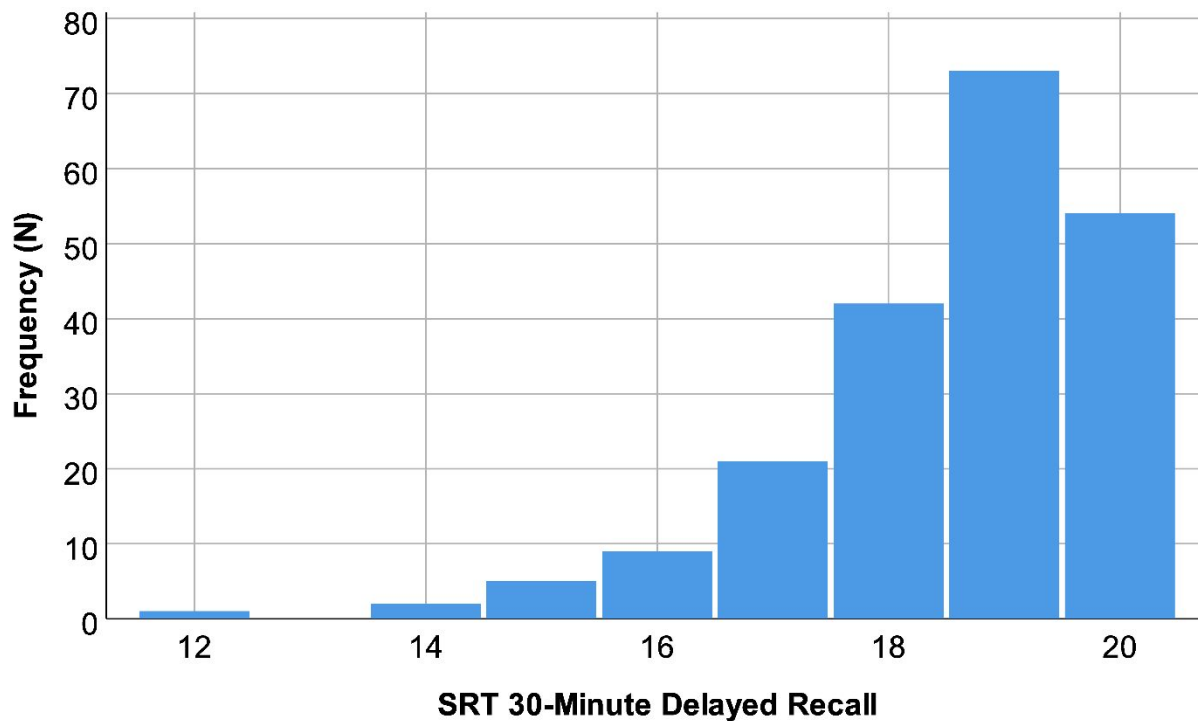

*Supplemental Figure S1.* A histogram of Story Recall Test (SRT) performance at the 30-minute delay interval is plotted for the largest subset of participants in the sample at baseline ( $N = 207$ ). Number of story units successfully recalled (out of 20) is on the x-axis and number of participants (frequency) is on the y-axis. The distribution was negatively skewed with many participants performing at or near ceiling (mean = 18.5 story units recalled).

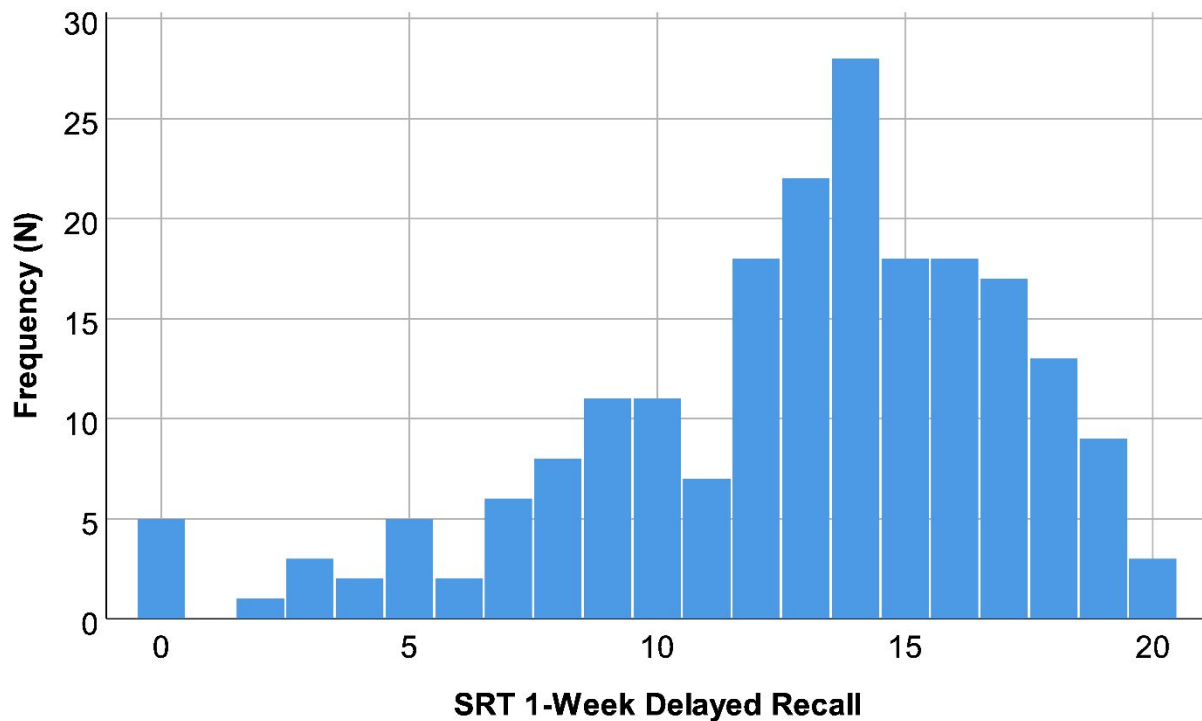

*Supplemental Figure S2.* A histogram of Story Recall Test (SRT) performance at the 1-week delay interval is plotted for the largest subset of participants in the sample at baseline ( $N = 207$ ). Number of story units successfully recalled (out of 20) is on the x-axis and number of participants (frequency) is on the y-axis. Relative to SRT 30-minute recall, the distribution for SRT 1-week recall was less skewed and more evenly dispersed with fewer participants performing at ceiling (mean = 12.8 story units recalled).
